# Supplementary material
Source: publisher figshare collection journal article supplement (https://asha.figshare.com/articles/dataset/_/20277726)
Supplement: Supplementary file 3 [file 1]

# Sample Goal Components

| Goal Component | Examples                                                                                                                                                                                                                                                             |
|----------------|----------------------------------------------------------------------------------------------------------------------------------------------------------------------------------------------------------------------------------------------------------------------|
| Conditions     | <b>Context (where, situation):</b> in therapy room, in individual treatment, in classroom, on playground, in lunchroom, during small-group discussion with grade-level peers, in community settings, when speaking on the phone                                      |
|                | <b>Supports:</b> following model/in imitation, verbal cue, visual cue, tactile prompt, hand-over-hand assistance, partial model, minimal/moderate/maximum assistance                                                                                                 |
|                | <b>Stimuli:</b> picture, spoken word, written word, category name, named items, spoken sentence, spoken paragraph, __ step verbal direction, conversation topic prompts, story prompt, conversational prompt, graphic organizer, short video, shared reading         |
| Performance    | <b>Articulation/phonology:</b> produce __ sound/phoneme, pronounce __ sound/phoneme                                                                                                                                                                                  |
|                | <b>Expressive language:</b> imitate, name, label, describe, state, express, list, complete, combine, use                                                                                                                                                             |
|                | <b>Receptive language:</b> follow directions, perform action, point to, match, select, identify, answer questions                                                                                                                                                    |
|                | <b>Voice/fluency:</b> implement __ voice technique, reduce vocal loudness by __ dB, suppress vocal misuse behaviors, implement __ fluency enhancing strategy, reduce disfluencies to a rate of __/minute, reduce average disfluency duration to less than __ seconds |
|                | <b>Level of complexity:</b> isolation, single word, structured phrase, spontaneous phrase, sentence, oral reading, spontaneous conversation, narrative text, expository text                                                                                         |
| Criterion      | <b>Accuracy:</b> __% accuracy, __ / __ opportunities, __ / __ trials, fewer than __ errors or occurrences of __ unwanted behavior                                                                                                                                    |
|                | <b>Duration:</b> __ seconds, __ minutes                                                                                                                                                                                                                              |
|                | <b>Frequency:</b> __ times/minute, __ times/class period, __ times/hour, __ times/day, __ consecutive trials                                                                                                                                                         |
|                | <b>Latency:</b> within __ seconds, within __ minutes, in less than __ seconds, in less than __ minutes                                                                                                                                                               |
|                | <b>Quality:</b> minimum score of __ on rubric, average score of __ on rubric, mild, moderate, mean length of utterance, average T-unit length                                                                                                                        |
