# Supplementary material
Source: publisher figshare collection journal article supplement (https://asha.figshare.com/articles/dataset/_/20277726)
Supplement: Supplementary file 4 [file 1]

# SLPA DATA COLLECTION FORM

Student: \_\_\_\_\_ Grade/Age: \_\_\_\_\_ IEP Review Date: \_\_\_\_\_  
 Goal 1: \_\_\_\_\_  
 Goal 2: \_\_\_\_\_  
 Goal 3: \_\_\_\_\_

(Include date, location, amount and type of services provided, activities/materials, response/progress & signature.)

| Date, Location & Type of Service                                                                                                                                                                                          | Goals, materials, and activities   | Responses | % |  |  |  |  |  |  |  |  |  |  |  |
|---------------------------------------------------------------------------------------------------------------------------------------------------------------------------------------------------------------------------|------------------------------------|-----------|---|--|--|--|--|--|--|--|--|--|--|--|
| Client Initials: _____<br>Date: _____<br>Location: _____<br>Start: _____ Stop: _____<br>Units: _____<br>1: 8-22 min, 2: 23-37 min,<br>3: 38-52 min, 4: 53-67 min<br>Type (Circle):<br>• Individual OR<br>Group of 2, 3, 4 |                                    |           |   |  |  |  |  |  |  |  |  |  |  |  |
|                                                                                                                                                                                                                           |                                    |           |   |  |  |  |  |  |  |  |  |  |  |  |
|                                                                                                                                                                                                                           |                                    |           |   |  |  |  |  |  |  |  |  |  |  |  |
|                                                                                                                                                                                                                           |                                    |           |   |  |  |  |  |  |  |  |  |  |  |  |
|                                                                                                                                                                                                                           |                                    |           |   |  |  |  |  |  |  |  |  |  |  |  |
|                                                                                                                                                                                                                           | Signatures: SLPA: _____ SLP: _____ |           |   |  |  |  |  |  |  |  |  |  |  |  |
| Client Initials: _____<br>Date: _____<br>Location: _____<br>Start: _____ Stop: _____<br>Units: _____<br>1: 8-22 min, 2: 23-37 min,<br>3: 38-52 min, 4: 53-67 min<br>Type (Circle):<br>• Individual OR<br>Group of 2, 3, 4 |                                    |           |   |  |  |  |  |  |  |  |  |  |  |  |
|                                                                                                                                                                                                                           |                                    |           |   |  |  |  |  |  |  |  |  |  |  |  |
|                                                                                                                                                                                                                           |                                    |           |   |  |  |  |  |  |  |  |  |  |  |  |
|                                                                                                                                                                                                                           |                                    |           |   |  |  |  |  |  |  |  |  |  |  |  |
|                                                                                                                                                                                                                           |                                    |           |   |  |  |  |  |  |  |  |  |  |  |  |
|                                                                                                                                                                                                                           | Signatures: SLPA: _____ SLP: _____ |           |   |  |  |  |  |  |  |  |  |  |  |  |
| Client Initials: _____<br>Date: _____<br>Location: _____<br>Start: _____ Stop: _____<br>Units: _____<br>1: 8-22 min, 2: 23-37 min,<br>3: 38-52 min, 4: 53-67 min<br>Type (Circle):<br>• Individual OR<br>Group of 2, 3, 4 |                                    |           |   |  |  |  |  |  |  |  |  |  |  |  |
|                                                                                                                                                                                                                           |                                    |           |   |  |  |  |  |  |  |  |  |  |  |  |
|                                                                                                                                                                                                                           |                                    |           |   |  |  |  |  |  |  |  |  |  |  |  |
|                                                                                                                                                                                                                           |                                    |           |   |  |  |  |  |  |  |  |  |  |  |  |
|                                                                                                                                                                                                                           |                                    |           |   |  |  |  |  |  |  |  |  |  |  |  |
|                                                                                                                                                                                                                           | Signatures: SLPA: _____ SLP: _____ |           |   |  |  |  |  |  |  |  |  |  |  |  |
| Client Initials: _____<br>Date: _____<br>Location: _____<br>Start: _____ Stop: _____<br>Units: _____<br>1: 8-22 min, 2: 23-37 min,<br>3: 38-52 min, 4: 53-67 min<br>Type (Circle):<br>• Individual OR<br>Group of 2, 3, 4 |                                    |           |   |  |  |  |  |  |  |  |  |  |  |  |
|                                                                                                                                                                                                                           |                                    |           |   |  |  |  |  |  |  |  |  |  |  |  |
|                                                                                                                                                                                                                           |                                    |           |   |  |  |  |  |  |  |  |  |  |  |  |
|                                                                                                                                                                                                                           |                                    |           |   |  |  |  |  |  |  |  |  |  |  |  |
|                                                                                                                                                                                                                           |                                    |           |   |  |  |  |  |  |  |  |  |  |  |  |
|                                                                                                                                                                                                                           | Signatures: SLPA: _____ SLP: _____ |           |   |  |  |  |  |  |  |  |  |  |  |  |
