# Supplementary material
Source: publisher figshare collection journal article supplement (https://asha.figshare.com/articles/dataset/_/20277726)
Supplement: Supplementary file 5 [file 1]

# Goal-Based Data Collection Worksheet

Goal: \_\_\_\_\_

|                    | Definition                                                                                                                                                                  | How It Informs Data Collection                                                                                                         | Goal Component | Notes |
|--------------------|-----------------------------------------------------------------------------------------------------------------------------------------------------------------------------|----------------------------------------------------------------------------------------------------------------------------------------|----------------|-------|
| <b>Conditions</b>  | Place, situation, supports, cues, prompts, and other elements that will be present when target behavior occurs. Includes what you do and say to elicit the target behavior. | <b>Context</b> (where, situation) data will be collected<br><b>Supports</b> (prompts, cues), and <b>stimuli</b> that will be provided. |                |       |
| <b>Performance</b> | The operationally defined (observable, measurable) target student behavior.                                                                                                 | Specific <b>action or behavior</b> the student will perform that needs to be measured.                                                 |                |       |
| <b>Criterion</b>   | The level at which the behavior will be performed to meet the goal.                                                                                                         | <b>Type of data</b> to collect (e.g., percent correct, rate, frequency, duration, etc.).                                               |                |       |

# SAMPLE Goal-Based Data Collection Worksheet

**Goal:** By the end of the school year, Johnny will use correct past tense in at least 9 out of 10 opportunities when retelling stories during group reading time. (American Speech-Language-Hearing Association, n.d.)

|                    | Definition                                                                                                                                              | How It Informs Data Collection                                                                                                        | Goal Component                                   | Notes                                                                                                       |
|--------------------|---------------------------------------------------------------------------------------------------------------------------------------------------------|---------------------------------------------------------------------------------------------------------------------------------------|--------------------------------------------------|-------------------------------------------------------------------------------------------------------------|
| <b>Conditions</b>  | Place, supports, cues, prompts, and other elements that will be present when target behavior occurs. What you do and say to elicit the target behavior. | <b>Context</b> (where, situation) data will be collected<br><b>Supports</b> (prompts, cues), and <b>stimuli</b> that will be provided | when retelling stories during group reading time | Context: group reading in classroom following story presentation                                            |
| <b>Performance</b> | The operationally defined (observable, measurable) target student behavior.                                                                             | Specific <b>action or behavior</b> the student will perform that needs to be measured.                                                | use correct past tense                           | verbal, narrative retelling tasks, regular and irregular past tense verbs<br>Record +/- and specific errors |
| <b>Criterion</b>   | The level at which the behavior will be performed to meet the goal.                                                                                     | <b>Type of data</b> to collect (e.g., percent correct, rate, frequency, duration, etc.).                                              | in at least 9 out of 10 opportunities            | +9/10 or 90% accuracy                                                                                       |

**Reference:** American Speech-Language-Hearing Association. (n.d.). *Person-centered focus on function: Language disorder*.  
<https://www.asha.org/siteassets/uploadedfiles/icf-language-disorder.pdf>
