# Supplementary material
Source: publisher figshare collection journal article supplement (https://asha.figshare.com/articles/dataset/_/20277726)
Supplement: Supplementary file 6 [file 1]

| Brown's Morphological Structures Present                                                                                   |                                                                |
|----------------------------------------------------------------------------------------------------------------------------|----------------------------------------------------------------|
| <i>Check the small box if structure was present in the sample, then list some examples in the larger box.</i>              |                                                                |
| Verb Forms                                                                                                                 | Other Morphemes of Note                                        |
| Present Progressive (-ing)                                                                                                 | Regular plurals (e.g., shoes)                                  |
| Irregular past tense forms                                                                                                 | Irregular plurals (e.g., geese)                                |
| Uncontractible copula (full form of the 'to be' verb as the only verb in a sentence, e.g., Is that you?)                   | Possessive 's marker                                           |
| Regular past verb tense (-ed, follows the rule)                                                                            | Articles (the, a, an)                                          |
| 3 <sup>rd</sup> person regular present tense (e.g., the kitty chews the fish.)                                             | Prepositions (e.g., in, on, up, here) <input type="checkbox"/> |
| 3 <sup>rd</sup> person irregular tense (e.g., she does)                                                                    |                                                                |
| Uncontractible auxiliary (full form of the 'to be' verb used as a helper verb in the sentence (e.g., Are they jumping?))   |                                                                |
| Contractible copula (shortened form of the 'to be' verb as the only verb in a sentence (e.g., It's fine.))                 |                                                                |
| Contractible auxiliary (shortened form of the 'to be' verb used as a helper verb in the sentence (e.g., They're jumping.)) |                                                                |

**Vocabulary Used (List Examples)**

| <i><b>Nouns</b></i> | <i><b>Verbs</b></i> | <i><b>Prepositions</b></i> | <i><b>Modifiers</b></i> | <i><b>Negation</b></i> |
|---------------------|---------------------|----------------------------|-------------------------|------------------------|
|                     |                     |                            |                         |                        |

**Nonverbal Communications (List Examples)**

| <i><b>Gestures Noted</b></i> | <i><b>Meaning/Interpretation</b></i> |
|------------------------------|--------------------------------------|
|                              |                                      |

| <b>Grammar Analysis</b> <i>List 2-3 examples in the box</i> |
|-------------------------------------------------------------|
| <i>Two Word Combinations List examples in the box</i>       |
| Agent + Action (e.g., <i>Daddy go</i> )                     |
| Action + object (e.g., <i>Eat grape</i> )                   |
| Agent + object (e.g., <i>Mommy sock</i> )                   |
| Action + location (e.g., <i>Go park</i> )                   |
| Entity + location (e.g., <i>Cup table</i> )                 |
| Possessor + possession (e.g., <i>My teddy</i> )             |
| Entity + attribute (e.g., <i>Big car</i> )                  |
| Demonstrative + entity (e.g., <i>That dog</i> )             |

| <b>Analysis of Questions Asked</b> <i>List 2-3 examples in the box</i> |
|------------------------------------------------------------------------|
| What, What doing?                                                      |
| Where?                                                                 |
| Who?                                                                   |
| Why?                                                                   |
| How?                                                                   |
| When?                                                                  |

| Complex Sentence Structures <i>List 2-3 examples in the box</i>                                                                                                                                            |
|------------------------------------------------------------------------------------------------------------------------------------------------------------------------------------------------------------|
| Simple infinitive clauses (e.g., <i>to go</i> )                                                                                                                                                            |
| Sentences containing <i>let's</i> or <i>let me</i>                                                                                                                                                         |
| Sentences containing full propositional elements headed by verbs: <i>like, guess, wish, wonder, hope, show, remember, pretend, forget, want, need</i> (e.g., <b><i>I remember</i></b> when you were sick.) |
| Sentences containing simple non-infinitive <i>wh</i> -clause marked by <i>what, where, why, how, if</i> , etc. (e.g., <i>I think that is <b>what I want.</b></i> )                                         |
| Sentences containing 2 clauses conjoined with conjunction <i>and</i>                                                                                                                                       |
| Sentences containing full propositional elements headed by verbs: <i>see, look watch</i> (e.g., <b><i>Watch</i></b> what I can do!)                                                                        |
| Sentences containing relative clauses (e.g., <i>The girl <b>who lives down the block</b> is my cousin.</i> )                                                                                               |
| Sentences containing full propositional elements headed by verbs: <i>like, think, know</i> (e.g., <b><i>I think</i></b> I would like to go home now.)                                                      |
| Conjunction <i>if</i>                                                                                                                                                                                      |
| Sentences containing gerund (-ing) clauses (e.g., <i>I like <b>skiing.</b></i> )                                                                                                                           |
| Sentences containing <i>wh</i> - infinitive clauses (e.g., <i>You know <b>how to make one.</b></i> )                                                                                                       |
| Conjunction <i>because</i>                                                                                                                                                                                 |
| Sentences containing clauses marked by <i>ask, tell, promise</i> (e.g., <b><i>I promise</i></b> to tell you.)                                                                                              |
| Conjunctions <i>when</i> and <i>so</i>                                                                                                                                                                     |

Adapted from:

Brown, R. (1973). *A first language: The early stages*. George Allen & Unwin.

Miller, J. F. (1981). *Assessing language production in children*. ProEd.

Shulman, B. (1983). *WordMaking Productions*. University of South Alabama.
