# Supplementary material
Source: publisher figshare collection journal article supplement (https://asha.figshare.com/articles/dataset/_/20277726)
Supplement: Supplementary file 7 [file 1]

## Language-Speech Therapy Data Sheets

Name: \_\_\_\_\_ DOB: \_\_\_\_\_ IEP: \_\_\_\_\_ Evaluation: \_\_\_\_\_

Long-Term Goal(s): \_\_\_\_\_

List short-term objectives below. On date of therapy, note % accuracy of targeted skills.

Absentees, check-outs, student behavior, and other notes may be included.

| Date | Goal 1 | Goal 2 | Goal 3 | Goal 4 | Goal 5 | Goal 6 | Goal 7 | Goal 8 |
|------|--------|--------|--------|--------|--------|--------|--------|--------|
|      |        |        |        |        |        |        |        |        |
|      |        |        |        |        |        |        |        |        |
|      |        |        |        |        |        |        |        |        |
|      |        |        |        |        |        |        |        |        |
|      |        |        |        |        |        |        |        |        |
|      |        |        |        |        |        |        |        |        |
|      |        |        |        |        |        |        |        |        |
|      |        |        |        |        |        |        |        |        |
|      |        |        |        |        |        |        |        |        |
|      |        |        |        |        |        |        |        |        |
|      |        |        |        |        |        |        |        |        |
|      |        |        |        |        |        |        |        |        |
|      |        |        |        |        |        |        |        |        |
|      |        |        |        |        |        |        |        |        |
|      |        |        |        |        |        |        |        |        |
|      |        |        |        |        |        |        |        |        |
|      |        |        |        |        |        |        |        |        |
